# Supplementary material
Source: publisher figshare collection journal article supplement (https://acs.figshare.com/ndownloader/files/4776994)
Supplement: Supplementary file 1 [file 4776994]

## Supporting Information

### Chemicals

$K_3[Fe(CN)_6]$  (Fisher Scientific Co., ACS grade),  $Na_4[Fe(CN)_6]$  (The Coleman and Bell Co., 99% min. assay),  $[Ru(NH_3)_6]Cl_3$  (Aldrich Chemical Co., 95% assay), and  $[Ru(NH_3)_6]Cl_2$  (Aldrich Chemical Co., 99.9+% assay) were used as obtained without further purification. To prepare  $[Co(4'-amino-2,2':6',2''-terpyridine)_2]Cl_2$ , the ligand 4'-amino-2,2':6',2''-terpyridine was initially prepared from 4'-chloro-2,2':6',2''-terpyridine (Aldrich Chemical Co.) using previously reported procedures (Mutai *et al.*, 2001).  $[Co(4'-amino-2,2':6',2''-terpyridine)_2]Cl_2$ ,  $[Co(2,2':6',2''-terpyridine)_2]Cl_2$ , and  $[Co(2', 2'-bipyridine)_3]Cl_2$  (abbreviated as  $[Co(tpy)_2]Cl_2$ ,  $[Co(atpy)_2]Cl_2$ , and  $[Co(bpy)_3]Cl_2$ , respectively, throughout the manuscript) were then synthesized according to published procedures (Hogg and Wilkins, 1962).

### Electrochemical Measurements

Electrochemical measurements were done on a BAS EC Epsilon instrument using a BAS (Japan) RE-1C Ag/AgCl reference electrode, a (99.99%) Pt wire as the counterelectrode and a 25  $\mu m$  diameter Pt wire ultramicroelectrode as the working electrode. For the controlled electrolysis steps a Pt coil made of a long Pt wire was employed in place of the microelectrode. All experiments were carried out in a three-compartment cell of conventional design where the individual compartments were separated by standard medium porosity frits.

### References

- Mutai, T.; Cheon, J.-D.; Arita, S.; Araki, K. *J. Chem. Soc., Perkin Trans. 2* **2001**, 7, 1045.
- Hogg, R.; Wilkins, R. G. *J. Chem. Soc.* **1962**, 341.
